# Supplementary material for: A systematic review and meta-analysis of prognostic biomarkers in resectable esophageal adenocarcinomas
Source: PubMed Central journal article supplement (PMC6125467; doi:10.1038/s41598-018-31548-6), 2018-09-05
Supplement: 41598_2018_31548_MOESM1_ESM.pdf [file 41598_2018_31548_MOESM1_ESM.pdf]

# **A systematic review and meta-analysis of prognostic biomarkers in resectable esophageal adenocarcinomas**

Aafke Creemers<sup>1,2\*</sup>, Eva A. Ebbing<sup>1,2\*</sup>, Thomas C. Pelgrim<sup>2</sup>, Sjoerd M. Lagarde<sup>3</sup>, Faridi S. van Etten – Jamaludin<sup>4</sup>, Mark I. van Berge Henegouwen<sup>5</sup>, Maarten C.C.M. Hulshof<sup>6</sup>, Kausilia K. Krishnadath<sup>1,7</sup>, Sybren L. Meijer<sup>8</sup>, Maarten F. Bijlsma<sup>1</sup>, Martijn G.H. van Oijen<sup>2</sup>, Hanneke W.M. van Laarhoven<sup>1,2</sup>

<sup>1</sup>Laboratory of Experimental Oncology and Radiobiology, Amsterdam UMC, Univ of Amsterdam, Cancer Center Amsterdam, Amsterdam, The Netherlands <sup>2</sup>Department of Medical Oncology, Amsterdam UMC, Univ of Amsterdam, Cancer Center Amsterdam, Amsterdam, The Netherlands <sup>3</sup>Department of Surgery, Erasmus Medical Center, Rotterdam, The Netherlands <sup>4</sup> Department of Medical Library Science, Amsterdam UMC, Univ of Amsterdam, Cancer Center Amsterdam, Amsterdam, The Netherlands <sup>5</sup>Department of Surgery Amsterdam UMC, Univ of Amsterdam, Cancer Center Amsterdam, Amsterdam, The Netherlands <sup>6</sup>Department of Radiotherapy, Amsterdam UMC, Univ of Amsterdam, Cancer Center Amsterdam, Amsterdam, The Netherlands <sup>7</sup>Department of Gastroenterology, Amsterdam UMC, Univ of Amsterdam, Cancer Center Amsterdam, Amsterdam, The Netherlands <sup>8</sup>Department of Pathology, Amsterdam UMC, Univ of Amsterdam, Cancer Center Amsterdam, Amsterdam, The Netherlands

\*These authors contributed equally to this work.

## Supplementary table S2. Quality assessment of the included studies according to the adapted

### REMARK criteria.

| Author              |      | C1<br>cohort<br>selection | C2<br>flow<br>inclusions | C3<br>used<br>material | C4<br>biomarker<br>methods | C5<br>received<br>therapy | C6<br>follow-up | C7<br>statistics | Total |
|---------------------|------|---------------------------|--------------------------|------------------------|----------------------------|---------------------------|-----------------|------------------|-------|
| Aichler, M.         | 2014 | 0,5                       | 0,5                      | 1                      | 1                          | 1                         | 1               | 1                | 6     |
| Bashash, M.         | 2013 | 1                         | 1                        | 1                      | 1                          | 1                         | 1               | 1                | 7     |
| Becker, L.          | 2010 | 1                         | 1                        | 1                      | 1                          | 0,5                       | 1               | 0                | 5,5   |
| Betts, G.           | 2014 | 0,5                       | 1                        | 1                      | 1                          | 1                         | 1               | 1                | 6,5   |
| Bettstetter, M.     | 2013 | 0,5                       | 0,5                      | 1                      | 1                          | 0                         | 0               | 1                | 4     |
| Bhandari, P.        | 2006 | 0,5                       | 1                        | 1                      | 1                          | 1                         | 1               | 1                | 6,5   |
| Bharthuar, A.       | 2014 | 0,5                       | 1                        | 1                      | 1                          | 1                         | 1               | 0,5              | 6     |
| Borg, D.            | 2016 | 1                         | 1                        | 1                      | 1                          | 1                         | 1               | 1                | 7     |
| Bradbury, P.A.      | 2009 | 0                         | 0,5                      | 0                      | 1                          | 1                         | 1               | 1                | 4,5   |
| Bradbury, P.A.      | 2009 | 0,5                       | 1                        | 1                      | 1                          | 0                         | 1               | 1                | 5,5   |
| Bradbury, P.A.      | 2009 | 1                         | 1                        | 1                      | 1                          | 1                         | 1               | 1                | 7     |
| Cescon, D           | 2009 | 0,5                       | 1                        | 0                      | 1                          | 0                         | 1               | 1                | 4,5   |
| Chan, E.            | 2016 | 1                         | 1                        | 1                      | 1                          | 1                         | 1               | 0,5              | 6,5   |
| Dahle-Smith, A.     | 2015 | 0,5                       | 0,5                      | 1                      | 1                          | 0                         | 1               | 0,5              | 4,5   |
| Davison, J.M.       | 2014 | 1                         | 1                        | 1                      | 1                          | 0                         | 1               | 1                | 6     |
| Davison, J.M.       | 2014 | 1                         | 1                        | 1                      | 1                          | 1                         | 1               | 1                | 7     |
| Derks, S.           | 2015 | 1                         | 0                        | 0                      | 1                          | 1                         | 0               | 0,5              | 3,5   |
| Dong, H.            | 2013 | 1                         | 1                        | 1                      | 1                          | 1                         | 1               | 0,5              | 6,5   |
| Dong, H.            | 2013 | 1                         | 1                        | 1                      | 1                          | 1                         | 1               | 0,5              | 6,5   |
| Dong, H.            | 2013 | 1                         | 1                        | 1                      | 1                          | 1                         | 1               | 1                | 7     |
| Donohoe, C.L.       | 2012 | 1                         | 0,5                      | 1                      | 1                          | 0                         | 0               | 1                | 4,5   |
| El-Mashed, S.       | 2015 | 0,5                       | 0,5                      | 1                      | 1                          | 1                         | 0               | 1                | 5     |
| Eng, L.             | 2015 | 1                         | 1                        | 1                      | 1                          | 0,5                       | 1               | 1                | 6,5   |
| Falkenback, D.      | 2008 | 1                         | 1                        | 1                      | 1                          | 1                         | 0               | 0                | 5     |
| Fisher, O.M.        | 2015 | 0,5                       | 0                        | 1                      | 1                          | 1                         | 1               | 1                | 5,5   |
| Fisher, O.M.        | 2015 | 0,5                       | 0,5                      | 1                      | 1                          | 1                         | 1               | 1                | 6     |
| Fisher, O.M.        | 2016 | 1                         | 1                        | 1                      | 1                          | 0,5                       | 0               | 1                | 5,5   |
| Goh, X.Y.           | 2011 | 0,5                       | 0,5                      | 1                      | 1                          | 0,5                       | ?               | 0,5              | 4     |
| Grimm, M.           | 2010 | 1                         | 1                        | 1                      | 1                          | 1                         | 1               | 0,5              | 6,5   |
| Hildebrandt, M.A.T. | 2009 | 0,5                       | 0,5                      | 1                      | 1                          | 1                         | 1               | 0,5              | 5,5   |
| Honing, J.          | 2014 | 0,5                       | 1                        | 1                      | 1                          | 1                         | 1               | 1                | 6,5   |
| Honing, J.          | 2015 | 0,5                       | 1                        | 1                      | 1                          | 1                         | 1               | 1                | 6,5   |
| Howard, J.M.        | 2014 | 0,5                       | 0,5                      | 1                      | 1                          | 0                         | 0               | 1                | 4     |
| Hu, P.              | 2015 | 1                         | 1                        | 1                      | 1                          | 0,5                       | 1               | 1                | 6,5   |
| Hu, Y.              | 2011 | 0,5                       | 0,5                      | 1                      | 1                          | 1                         | 0               | 1                | 5     |
| Huang, J.           | 2009 | 0,5                       | 0,5                      | 1                      | 1                          | 1                         | 0,5             | 1                | 5,5   |
| Izzo, J.G.          | 2007 | 0,5                       | 1                        | 1                      | 1                          | 1                         | 1               | 1                | 6,5   |
| Izzo, J.G.          | 2007 | 0,5                       | 1                        | 1                      | 1                          | 1                         | 1               | 1                | 6,5   |
| Kim, S.M.           | 2010 | 0,5                       | 0                        | 1                      | 1                          | 0                         | 0               | 1                | 3,5   |
| Langer, R.          | 2006 | 1                         | 1                        | 1                      | 1                          | 1                         | 1               | 0,5              | 6,5   |
| Langer, R.          | 2008 | 0,5                       | 0,5                      | 1                      | 1                          | 1                         | 1               | 0,5              | 5,5   |
| Langer, R.          | 2011 | 0,5                       | 1                        | 1                      | 1                          | 1                         | 1               | 1                | 6,5   |

|                     |      |     |     |   |   |     |     |     |     |
|---------------------|------|-----|-----|---|---|-----|-----|-----|-----|
| Lee, M.J.           | 2011 | 0,5 | 1   | 1 | 1 | 1   | 0   | 1   | 5,5 |
| Li, Z.              | 2015 | 1   | 1   | 1 | 1 | 1   | 1   | 1   | 7   |
| Loos, M.            | 2011 | 0,5 | 0,5 | 1 | 1 | 1   | 1   | 0,5 | 5,5 |
| Lu, X.              | 2016 | 1   | 1   | 1 | 1 | 0,5 | 1   | 1   | 6,5 |
| Lui, N.S.           | 2015 | 1   | 1   | 1 | 1 | 0   | 1   | 1   | 6   |
| Madani, K.          | 2010 | 0,5 | 1   | 1 | 1 | 1   | 1   | 0,5 | 6   |
| Maru, D.M.          | 2009 | 1   | 0,5 | 1 | 1 | 0   | 1   | 0,5 | 5   |
| Mesteri, I.         | 2014 | 0,5 | 1   | 1 | 1 | 0   | 1   | 1   | 5,5 |
| Mirza, A.           | 2014 | 1   | 1   | 1 | 1 | 0,5 | 1   | 0,5 | 6   |
| Nagaraja, V.        | 2016 | 1   | 1   | 1 | 1 | 0,5 | 0,5 | 0,5 | 5,5 |
| Nguyen, G.H.        | 2010 | 0,5 | 1   | 1 | 1 | 1   | 1   | 1   | 6,5 |
| Obulkasim, A.       | 2016 | 1   | 1   | 1 | 1 | 1   | 1   | 0   | 6   |
| Ong, C.A.J.         | 2013 | 0,5 | 1   | 1 | 1 | 0   | 1   | 1   | 5,5 |
| Pavlov, K.          | 2015 | 0,5 | 1   | 1 | 1 | 0   | 1   | 0,5 | 5   |
| Pennathur, A.       | 2013 | 0,5 | 0,5 | 1 | 1 | 0   | 1   | 1   | 5   |
| Phillips, B.E.      | 2013 | 1   | 1   | 1 | 1 | 1   | 1   | 1   | 7   |
| Prins, M.J.         | 2012 | 0,5 | 1   | 1 | 1 | 0   | 1   | 1   | 5,5 |
| Prins, M.J.         | 2013 | 0,5 | 1   | 1 | 1 | 1   | 1   | 1   | 6,5 |
| Prins, M.J.         | 2015 | 0,5 | 1   | 1 | 1 | 1   | 1   | 1   | 6,5 |
| Prins, M.J.         | 2014 | 0,5 | 1   | 1 | 1 | 0   | 1   | 1   | 5,5 |
| Prins, M.J.D.       | 2013 | 0,5 | 1   | 1 | 1 | 1   | 1   | 1   | 6,5 |
| Rauser, S.          | 2007 | 1   | 0   | 1 | 1 | 1   | 1   | 1   | 6   |
| Renouf, D.J.        | 2013 | 0,5 | 1   | 0 | 1 | 1   | 1   | 1   | 5,5 |
| Singhi, A.D.        | 2015 | 0,5 | 1   | 1 | 1 | 0   | 1   | 1   | 5,5 |
| Slotta-Huspenia, J. | 2012 | 0,5 | 1   | 1 | 1 | 1   | 1   | 1   | 6,5 |
| Slotta-Huspenia, J. | 2014 | 1   | 1   | 1 | 1 | 0   | 1   | 0   | 5   |
| Smith, E.           | 2014 | 1   | 0,5 | 1 | 1 | 1   | 1   | 1   | 6,5 |
| Smith, E.           | 2016 | 1   | 1   | 1 | 1 | 1   | 1   | 0   | 6   |
| Streppel, M.M.      | 2012 | 0,5 | 0,5 | 1 | 1 | 0   | 0   | 1   | 4   |
| Sun, L.             | 2014 | 1   | 1   | 1 | 1 | 1   | 1   | 1   | 7   |
| Tokunaga, R.        | 2015 | 1   | 0,5 | 1 | 1 | 1   | 1   | 1   | 6,5 |
| Underwood, T.J.     | 2015 | 0,5 | 0   | 1 | 1 | 0   | 1   | 0,5 | 4   |
| Vashist, Y.K.       | 2012 | 1   | 1   | 1 | 1 | 1   | 1   | 0,5 | 6,5 |
| Vashist, Y.K.       | 2014 | 0,5 | 0   | 1 | 1 | 0   | 0   | 1   | 3,5 |
| von Rahden, B.H.A.  | 2010 | 0,5 | 1   | 1 | 1 | 0,5 | 1   | 0,5 | 5,5 |
| von Rahden, B.H.A.  | 2011 | 1   | 1   | 1 | 1 | 1   | 1   | 0,5 | 6,5 |
| Wang, K.L.          | 2006 | 1   | 1   | 1 | 1 | 0   | 1   | 1   | 6   |
| Wang, K.L.          | 2007 | 1   | 1   | 1 | 1 | 0   | 1   | 1   | 6   |
| Xie, L.X.           | 2013 | 1   | 1   | 1 | 1 | 1   | 1   | 1   | 7   |
| Yoon, H.H.          | 2012 | 1   | 1   | 1 | 1 | 1   | 1   | 1   | 7   |
| Yoon, H.H.          | 2012 | 1   | 1   | 1 | 1 | 1   | 1   | 1   | 7   |
| Zhai, R.            | 2015 | 0,5 | 1   | 1 | 1 | 0,5 | 0   | 1   | 5   |

Supplementary figure S3.

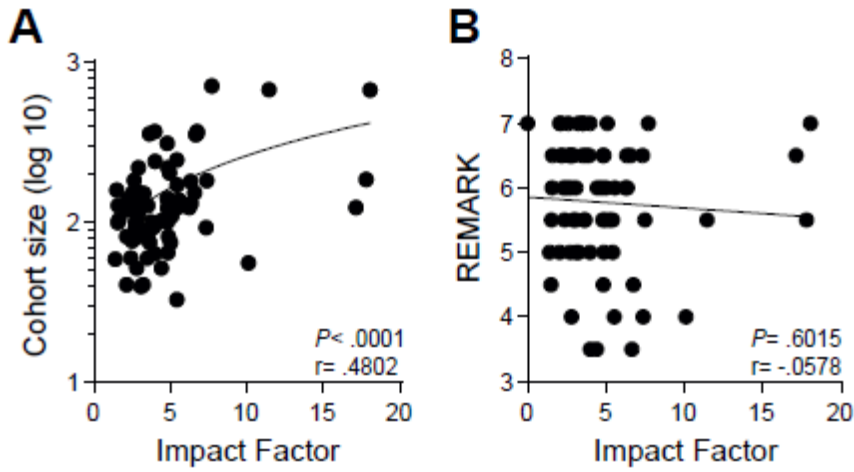

Supplementary figure S3. Correlations between cohort size and impact factor (A) and scored quality of the included articles on the adapted REMARK criteria scale and impact factor (B).

Supplementary figure S4.

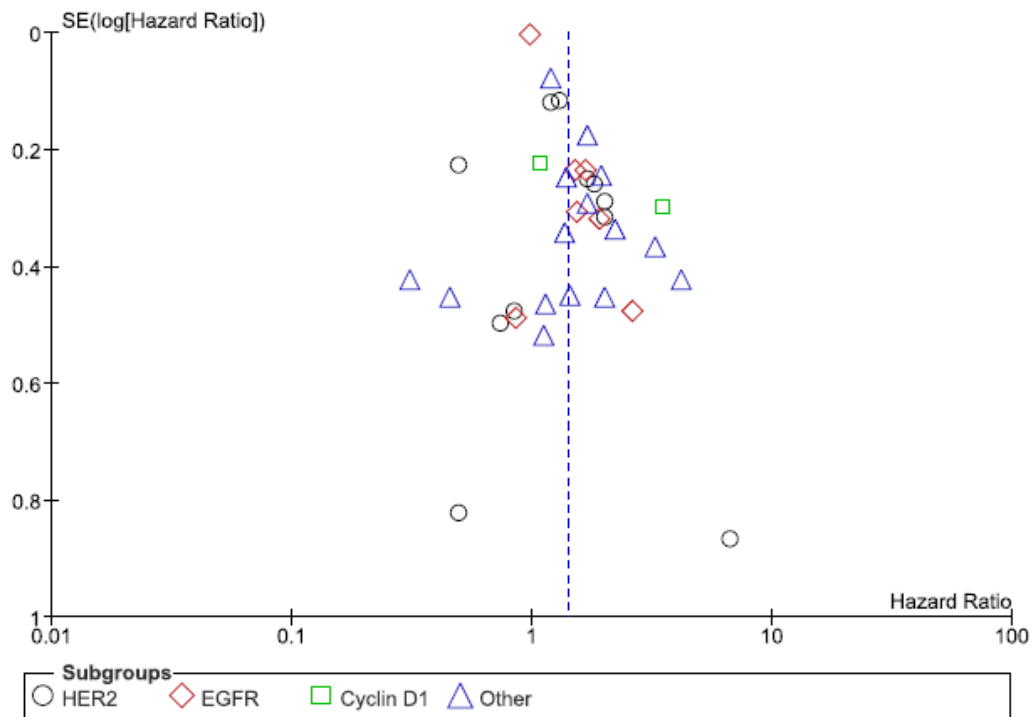

Supplementary figure S4. Funnel plot assessing publication bias of the adapted hallmark of cancer 'proliferation'.

## Supplementary information S5.

Literature search conducted: 19-1-2017

Total 6494 hits

Duplicates removed total: 3294 hits.

### MEDLINE (Ovid):

Database(s): Epub Ahead of Print, In-Process & Other Non-Indexed Citations, Ovid MEDLINE(R) Daily and Ovid MEDLINE(R) 1946 to Present

Search Strategy:

| # | Searches                                                                                                                                                                                                                                                                                                                                                       | Results |
|---|----------------------------------------------------------------------------------------------------------------------------------------------------------------------------------------------------------------------------------------------------------------------------------------------------------------------------------------------------------------|---------|
| 1 | (*Esophageal Neoplasms/ or Esophagectomy/ or ((esophagus or esophageal or esophagogastric or oesophagus or oesophageal or oesophagogastric or gastroesophag* or gastrooesophag*) adj3 (neoplas* or cancer* or carcino* or adenocarcino* or tumor* or tumour* or malig*)),ti,ab. or (esophagectom* or oesophagectom*).ti,ab.) and (survival or prognos*).ti,ab. | 14620   |
| 2 | Survival/ or exp Survival Analysis/ or Survival Rate/ or Prognosis/ or (surviv* or kaplan-meier or prognos* or predict* or longterm or long-term).ti,ab.                                                                                                                                                                                                       | 3323917 |
| 3 | exp Biological Markers/ or Gene Expression/ or "Gene Expression Regulation, Neoplastic"/ or Gene Expression Profiling/ or Esophageal Neoplasms/ge or (biomarker* or marker* or expressi* or expressed or overexpressi* or overexpressed).ti,ab.                                                                                                                | 3511265 |
| 4 | 1 and 2 and 3                                                                                                                                                                                                                                                                                                                                                  | 4532    |
| 5 | limit 4 to (english and last 10 years)                                                                                                                                                                                                                                                                                                                         | 3245    |

### EMBASE (Ovid):

Database(s): Embase Classic+Embase 1947 to 2017 January 18

Search Strategy:

| # | Searches                                                                                                                                                                                                                                                                                                                                                             | Results |
|---|----------------------------------------------------------------------------------------------------------------------------------------------------------------------------------------------------------------------------------------------------------------------------------------------------------------------------------------------------------------------|---------|
| 1 | (exp *esophagus tumor/ or *esophagus resection/ or ((esophagus or esophageal or esophagogastric or oesophagus or oesophageal or oesophagogastric or gastroesophag* or gastrooesophag*) adj3 (neoplas* or cancer* or carcino* or adenocarcino* or tumor* or tumour* or malig*)),ti,ab. or (esophagectom* or oesophagectom*).ti,ab.) and (survival or prognos*).ti,ab. | 19090   |
| 2 | exp survival/ or Kaplan Meier method/ or exp prognosis/ or (surviv* or kaplan-meier or prognos* or predict* or longterm or long-term).ti,ab.                                                                                                                                                                                                                         | 3980256 |
| 3 | exp marker/ or gene expression/ or gene overexpression/ or gene expression regulation/ or gene expression profiling/ or genotype/ or gene amplification/ or (biomarker* or marker* or expressi* or expressed or overexpressi* or overexpressed).ti,ab.                                                                                                               | 4334235 |
| 4 | 1 and 2 and 3                                                                                                                                                                                                                                                                                                                                                        | 5980    |
| 5 | (animal*.hw. or exp animal/) not human/                                                                                                                                                                                                                                                                                                                              | 5432962 |
| 6 | 4 not 5                                                                                                                                                                                                                                                                                                                                                              | 5905    |
| 7 | limit 6 to (english and last 10 years)                                                                                                                                                                                                                                                                                                                               | 4559    |
| 8 | limit 6 to (conference abstract or conference paper or conference proceeding or "conference review")                                                                                                                                                                                                                                                                 | 1477    |
| 9 | 7 not 8                                                                                                                                                                                                                                                                                                                                                              | 3105    |

### Cochrane Central Register of Controlled Trials

<http://onlinelibrary.wiley.com/cochranelibrary/search/advanced/shared/searches/6515280765701507567>

166 trials

ID Search Hits

#1 ((esophagus or esophageal or esophagogastric or oesophagus or oesophageal or oesophagogastric or gastroesophag\* or gastrooesophag\*) near/3 (neoplas\* or cancer\* or carcino\* or adenocarcino\* or tumor\* or tumour\* or malig\*)):ti,ab,kw or (esophagectom\* or oesophagectom\*):ti,ab,kw 2823

#2 (surviv\* or kaplan-meier or prognos\* or predict\* or longterm or long-term):ti,ab,kw 168115

#3 (biomarker\* or marker\* or expressi\* or expressed or overexpressi\* or overexpressed or gene\* or genotype\*):ti,ab,kw 159342

#4 MeSH descriptor: [Gene Expression Regulation] explode all trees 2306

#5 #3 or #4 159836

#6 #1 and #2 and #5 Publication Year from 2007 to 2017, in Trials 166
